# Supplementary material for: Light and dopamine impact two circadian neurons to promote morning wakefulness
Source: PubMed Central journal article supplement (PMC11404089; doi:10.1016/j.cub.2024.07.056), 2024-08-13
Supplement: NIHMS2013477-supplement-2.pdf [file NIHMS2013477-supplement-2.pdf]

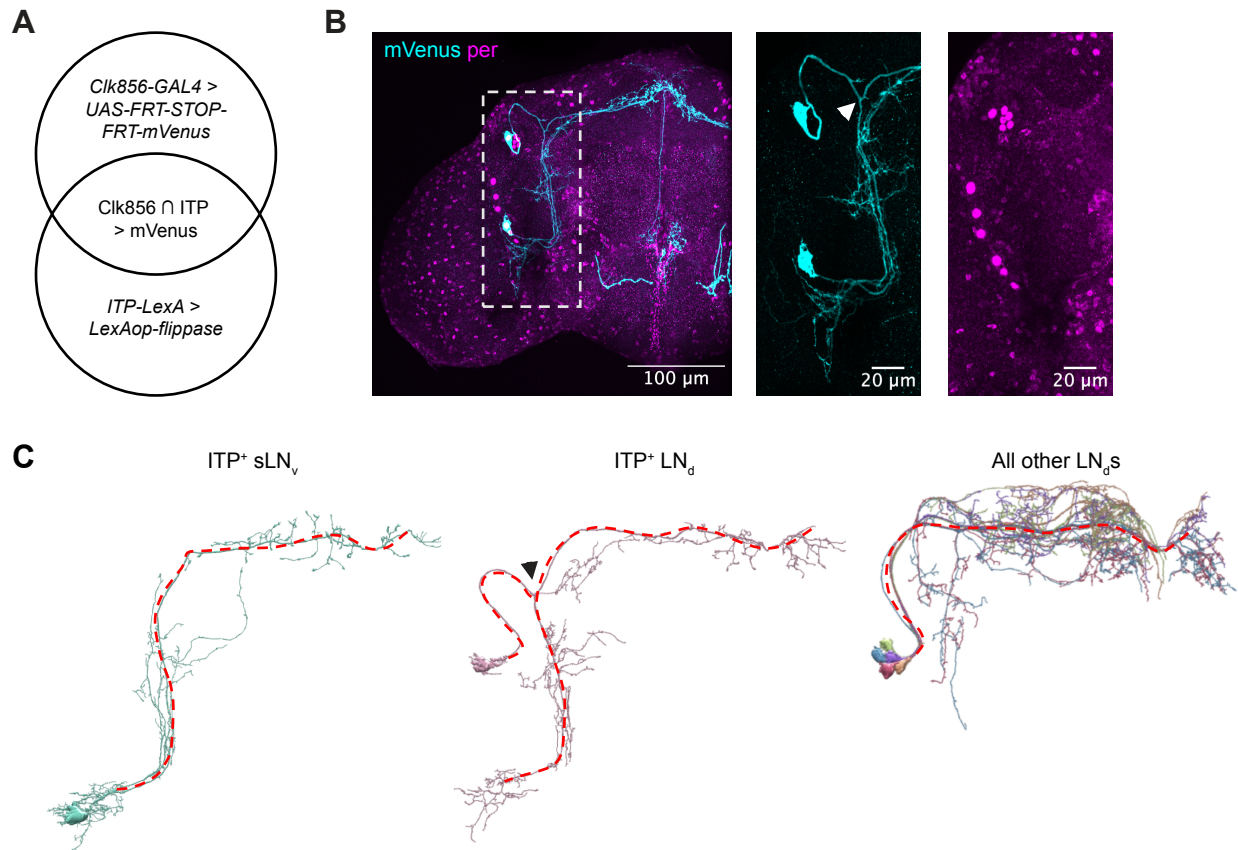

**Figure S1. The ITP<sup>+</sup> LN<sub>d</sub> is morphologically distinct by a characteristic axonal bifurcation. Related to Figure 1.**

- (A) An intersectional strategy to label cells in common to *Clk856-GAL4* and *ITP-LexA* driver lines with mVenus.
- (B) Representative images of the intersection of *Clk856-GAL4* and *ITP-LexA* marked by mVenus (cyan) and period (magenta) antibody staining. Center and right images are a close-up of the dashed white box area on the left. White arrowhead marks an axonal bifurcation characteristic of ITP<sup>+</sup> LN<sub>d</sub>s.
- (C) EM connectome tracing of the ITP<sup>+</sup> LN<sub>d</sub>s and the other LN<sub>o</sub>s. Axons are marked with red dashed lines. EM reconstructions were visualized using NeuPrint.<sup>S1</sup>

**A** *Clk856-GAL4*  $\cap$  *Trissin-LexA* > *UAS-CsChrimson-mVenus*

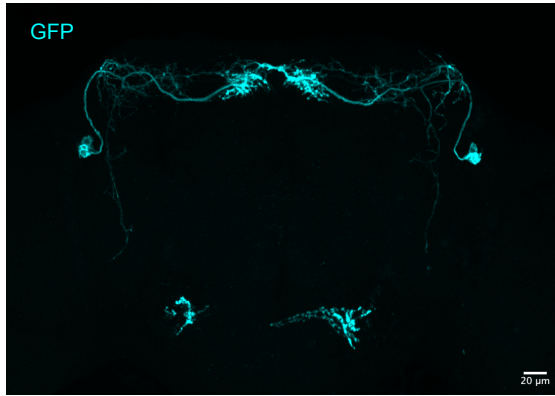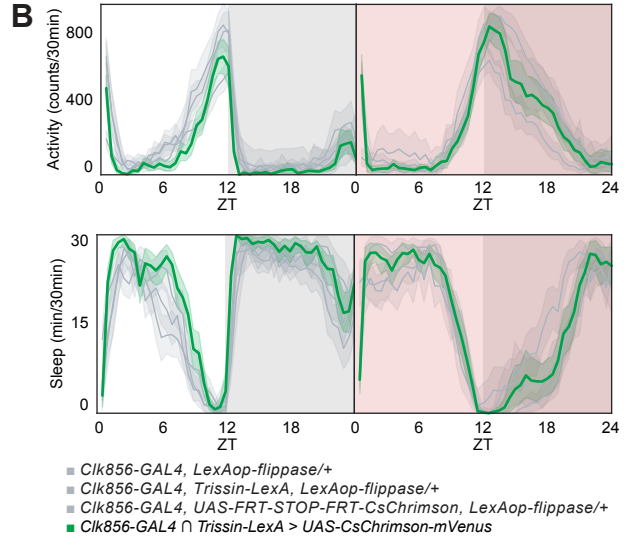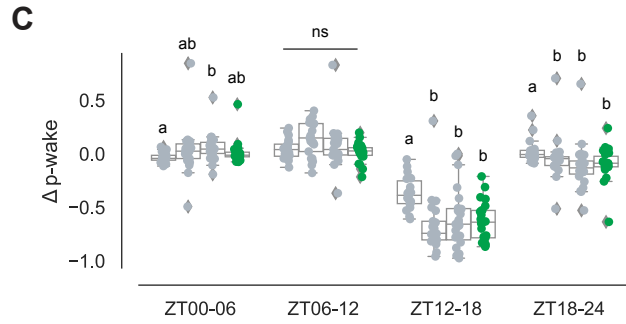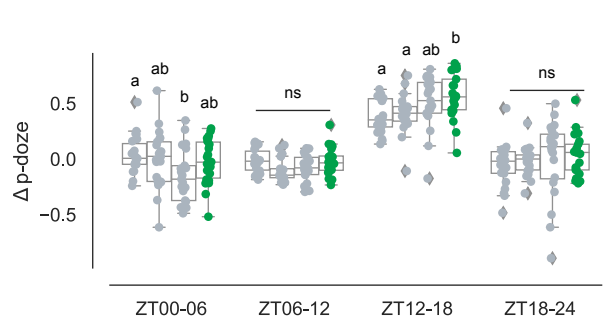

**D** *MB122B-GAL4* > *UAS-EGFP*

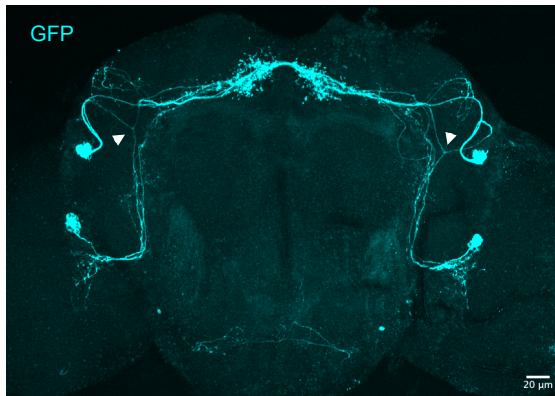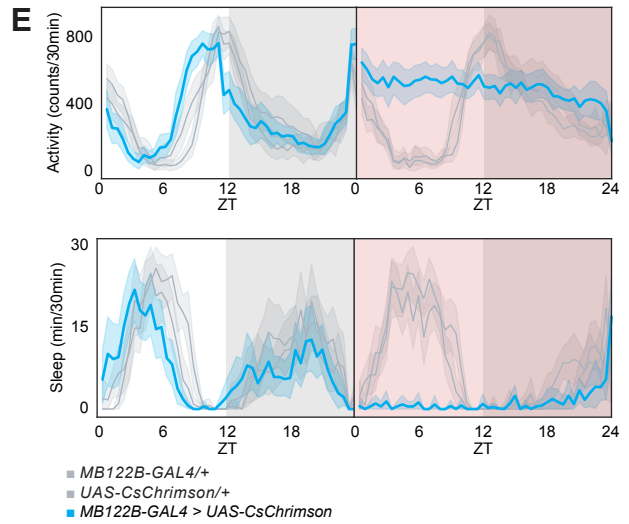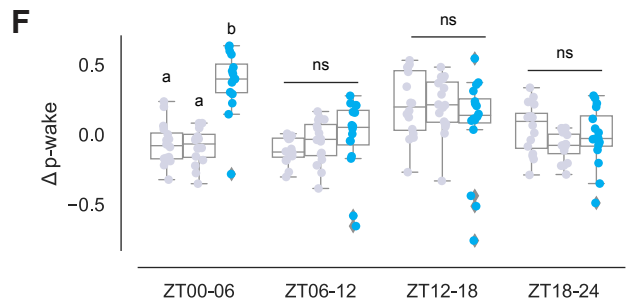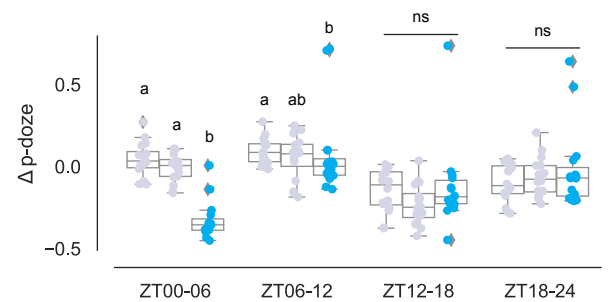

**Figure S2. ITP<sup>+</sup> LNs and not the Trissin<sup>+</sup> LN<sub>s</sub> are sufficient for promoting activity. Related to Figure 2.**

- (A) Representative whole-brain maximum intensity projection of the intersection of *Clk856-GAL4* and *Trissin-LexA* labeling Trissin<sup>+</sup> LN<sub>s</sub> with GFP (cyan) antibody staining.
- (B) Timeseries plots of activity and sleep of male flies expressing red light-sensitive CsChrimson in Trissin<sup>+</sup> LN<sub>s</sub> at baseline (left) and with 24-hour red LED optogenetic activation (right) in 12:12 LD. Heterozygous no UAS/LexA (n=22), no UAS (n=21), and no LexA (n=23) controls are in gray. Experimental flies (n=22) expressing all transgenes are colored. Bold lines are means and shaded regions are 95% confidence intervals of the means.
- (C) Boxplots quantifying the change in p-wake (left) and p-doze (right) of male flies expressing red light-sensitive CsChrimson in Trissin<sup>+</sup> LN<sub>s</sub> during the red LED optogenetic activation day from baseline day in six-hour time bins. Genotypes are depicted by the same color scheme as in (B). Letters represent statistically distinct groups as tested by a Kruskal Wallis test, post-hoc Mann Whitney U multiple comparisons method, and a Bonferroni-corrected significance value of  $p < 0.008333$ . Groups labeled with “ns” are not statistically distinct.
- (D) Representative whole-brain maximum intensity projection of *MB122B-GAL4* labeling ITP<sup>+</sup> LNs and Trissin<sup>+</sup> LN<sub>s</sub> with GFP (cyan) antibody staining. Axonal bifurcations of the ITP<sup>+</sup> LN<sub>s</sub> are marked by white arrowheads.
- (E) Timeseries plots of activity and sleep of female flies expressing red light-sensitive CsChrimson in ITP<sup>+</sup> LNs and Trissin<sup>+</sup> LN<sub>s</sub> at baseline (left) and with 24-hour red LED optogenetic activation (right) in 12:12 LD. Heterozygous *MB122B-GAL4* (n=16) and *UAS-CsChrimson* (n=15) controls are in gray. Experimental flies (n=13) expressing both transgenes are colored. Bold lines are means and shaded regions are 95% confidence intervals of the means.
- (F) Boxplots quantifying the change in p-wake (left) and p-doze (right) sleep of female flies expressing red light-sensitive CsChrimson in ITP<sup>+</sup> LNs and Trissin<sup>+</sup> LN<sub>s</sub> during the red LED optogenetic activation day from baseline day in six-hour time bins. Genotypes are depicted by the same color scheme as in (E). Letters represent statistically distinct groups as tested by a Kruskal Wallis test, post-hoc Mann Whitney U multiple comparisons method, and a Bonferroni-corrected significance value of  $p < 0.01667$ . Groups labeled with “ns” are not statistically distinct.

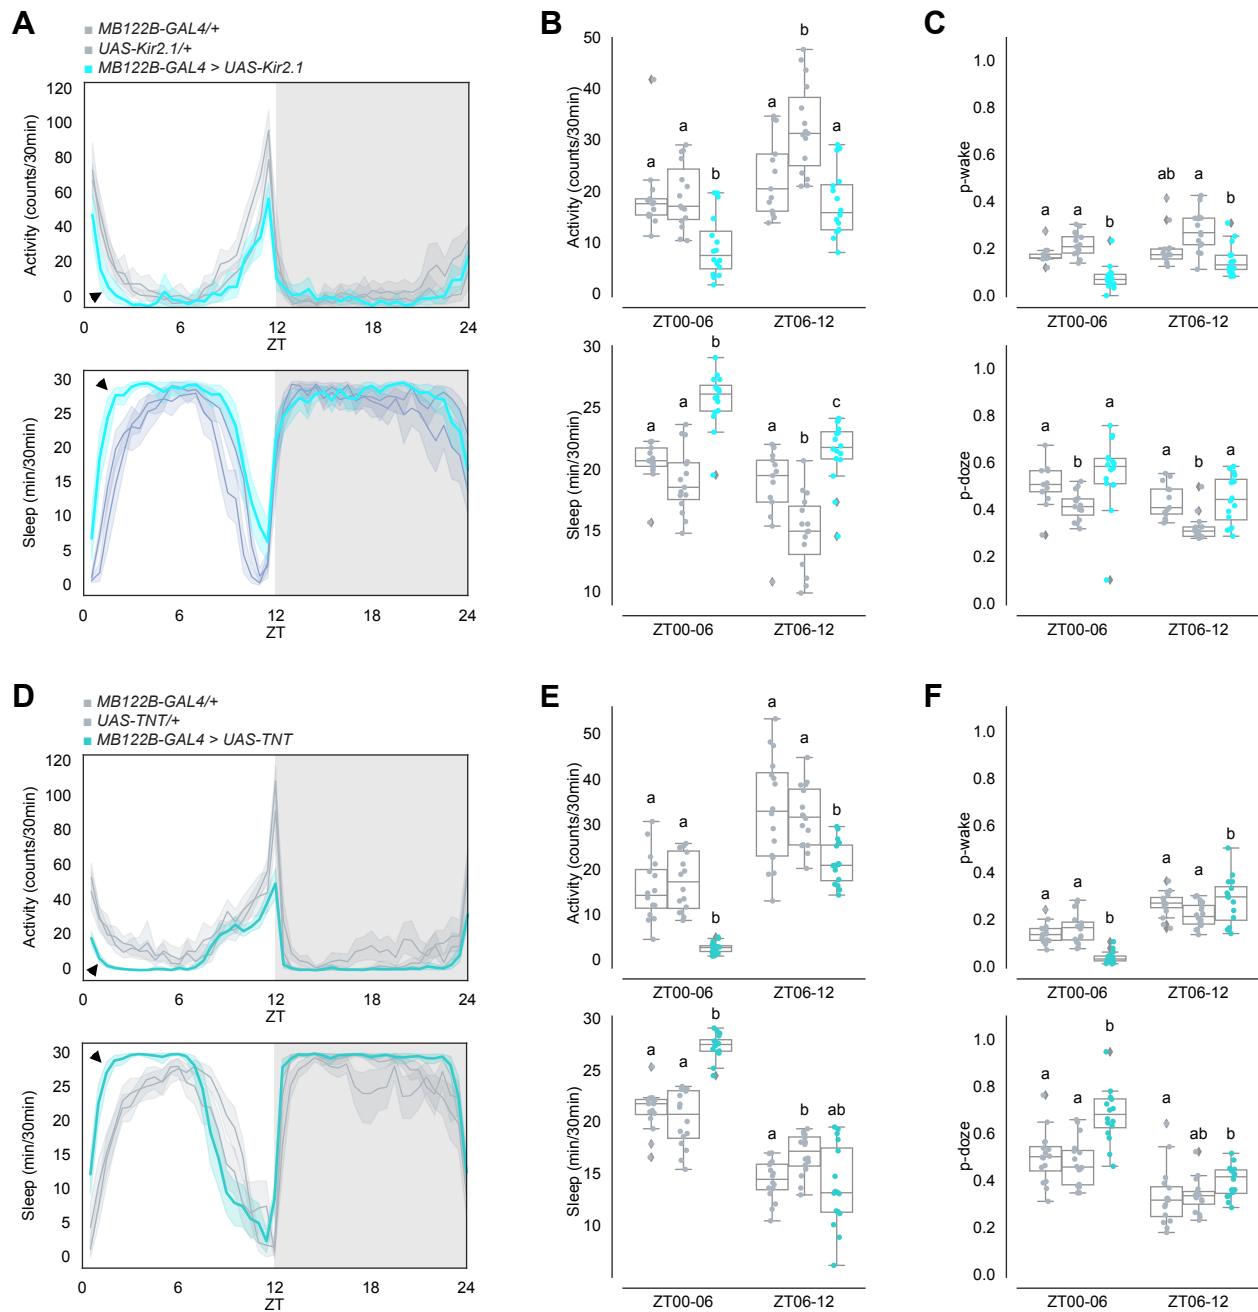

**Figure S3. Inhibiting ITP<sup>+</sup> LNs and Trissin<sup>+</sup> LN<sub>d</sub>s decreases morning wakefulness after the onset of light. Related to Figure 3.**

- (A) Timeseries plots of activity (top) and sleep (bottom) of male flies expressing inhibitory Kir2.1 potassium channels in ITP<sup>+</sup> LNs and Trissin<sup>+</sup> LN<sub>d</sub>s in 12:12 LD. Heterozygous *MB122B-GAL4* (n=13) and *UAS-Kir2.1* (n=15) controls are in gray. Experimental flies (n=16) expressing all transgenes are colored. Bold lines are means and shaded regions are 95% confidence intervals of the means. Black arrowheads point to the major difference between control and experimental flies between ZT00 and ZT06.
- (B) Boxplots quantifying activity (top) and sleep (bottom) of male flies expressing inhibitory Kir2.1 potassium channels in ITP<sup>+</sup> LNs and Trissin<sup>+</sup> LN<sub>d</sub>s during ZT00-06 and ZT06-12 daytime bins. Genotypes are depicted by the same color scheme as in (A). Letters represent statistically distinct groups as tested by a Kruskal Wallis test, post-hoc Mann Whitney U multiple comparisons

method, and a Bonferroni-corrected significance value of  $p < 0.01667$ . Groups labeled with “ns” are not statistically distinct.

- (C) Boxplots quantifying p-wake (top) and p-doze (bottom) of male flies expressing inhibitory Kir2.1 potassium channels in ITP<sup>+</sup> LNs and Trissin<sup>+</sup> LN<sub>ds</sub> during ZT00-06 and ZT06-12 daytime bins. Genotypes are depicted by the same color scheme as in (A). Letters represent statistically distinct groups as tested by a Kruskal Wallis test, post-hoc Mann Whitney U multiple comparisons method, and a Bonferroni-corrected significance value of  $p < 0.01667$ . Groups labeled with “ns” are not statistically distinct.
- (D) Timeseries plots of activity (top) and sleep (bottom) of male flies expressing synaptic transmission inhibitor TNT in ITP<sup>+</sup> LNs and Trissin<sup>+</sup> LN<sub>ds</sub> in 12:12 LD. Heterozygous *MB122B-GAL4* (n=16) and *UAS-TNT* (n=16) controls are in gray. Experimental flies (n=16) expressing all transgenes are colored. Bold lines are means and shaded regions are 95% confidence intervals of the means. Black arrowheads point to the major difference between control and experimental flies between ZT00 and ZT06.
- (E) Boxplots quantifying activity (top) and sleep (bottom) of male flies expressing synaptic transmission inhibitor TNT in ITP<sup>+</sup> LNs and Trissin<sup>+</sup> LN<sub>ds</sub> during ZT00-06 and ZT06-12 daytime bins. Genotypes are depicted by the same color scheme as in (D). Letters represent statistically distinct groups as tested by a Kruskal Wallis test, post-hoc Mann Whitney U multiple comparisons method, and a Bonferroni-corrected significance value of  $p < 0.01667$ . Groups labeled with “ns” are not statistically distinct.
- (F) Boxplots quantifying p-wake (top) and p-doze (bottom) of male flies expressing synaptic transmission inhibitor TNT in ITP<sup>+</sup> LNs and Trissin<sup>+</sup> LN<sub>ds</sub> during ZT00-06 and ZT06-12 daytime bins. Genotypes are depicted by the same color scheme as in (D). Letters represent statistically distinct groups as tested by a Kruskal Wallis test, post-hoc Mann Whitney U multiple comparisons method, and a Bonferroni-corrected significance value of  $p < 0.01667$ . Groups labeled with “ns” are not statistically distinct.

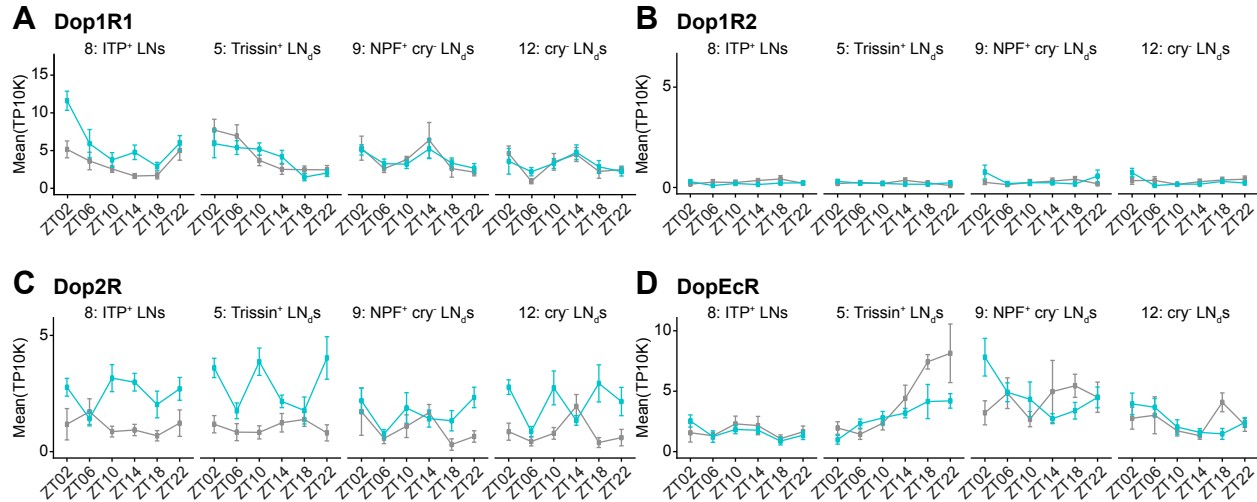

**Figure S4. *Dop1R1* mRNA cycles in 12:12 LD in ITP<sup>+</sup> LNs but not in the other LN<sub>s</sub>. Related to Figure 4.**

- (A) Timeseries plots of *Dop1R1* mRNA expression levels around the clock in distinct evening cell subtypes from previously published single-cell RNA sequencing data.<sup>S2</sup> Blue lines are mRNA levels in 12:12 LD and gray lines are mRNA levels in DD. Lines are mean values in number of transcripts per ten thousand transcripts and bars represent the standard error of the mean.
- (B) Timeseries plots of *Dop1R2* mRNA expression levels around the clock in distinct evening cell subtypes from previously published single-cell RNA sequencing data.<sup>S2</sup> Blue lines are mRNA levels in 12:12 LD and gray lines are mRNA levels in DD. Lines are mean values in number of transcripts per ten thousand transcripts and bars represent the standard error of the mean.
- (C) Timeseries plots of *Dop2R* mRNA expression levels around the clock in distinct evening cell subtypes from previously published single-cell RNA sequencing data.<sup>S2</sup> Blue lines are mRNA levels in 12:12 LD and gray lines are mRNA levels in DD. Lines are mean values in number of transcripts per ten thousand transcripts and bars represent the standard error of the mean.
- (D) Timeseries plots of *DopEcR* mRNA expression levels around the clock in distinct evening cell subtypes from previously published single-cell RNA sequencing data.<sup>S2</sup> Blue lines are mRNA levels in 12:12 LD and gray lines are mRNA levels in DD. Lines are mean values in number of transcripts per ten thousand transcripts and bars represent the standard error of the mean.

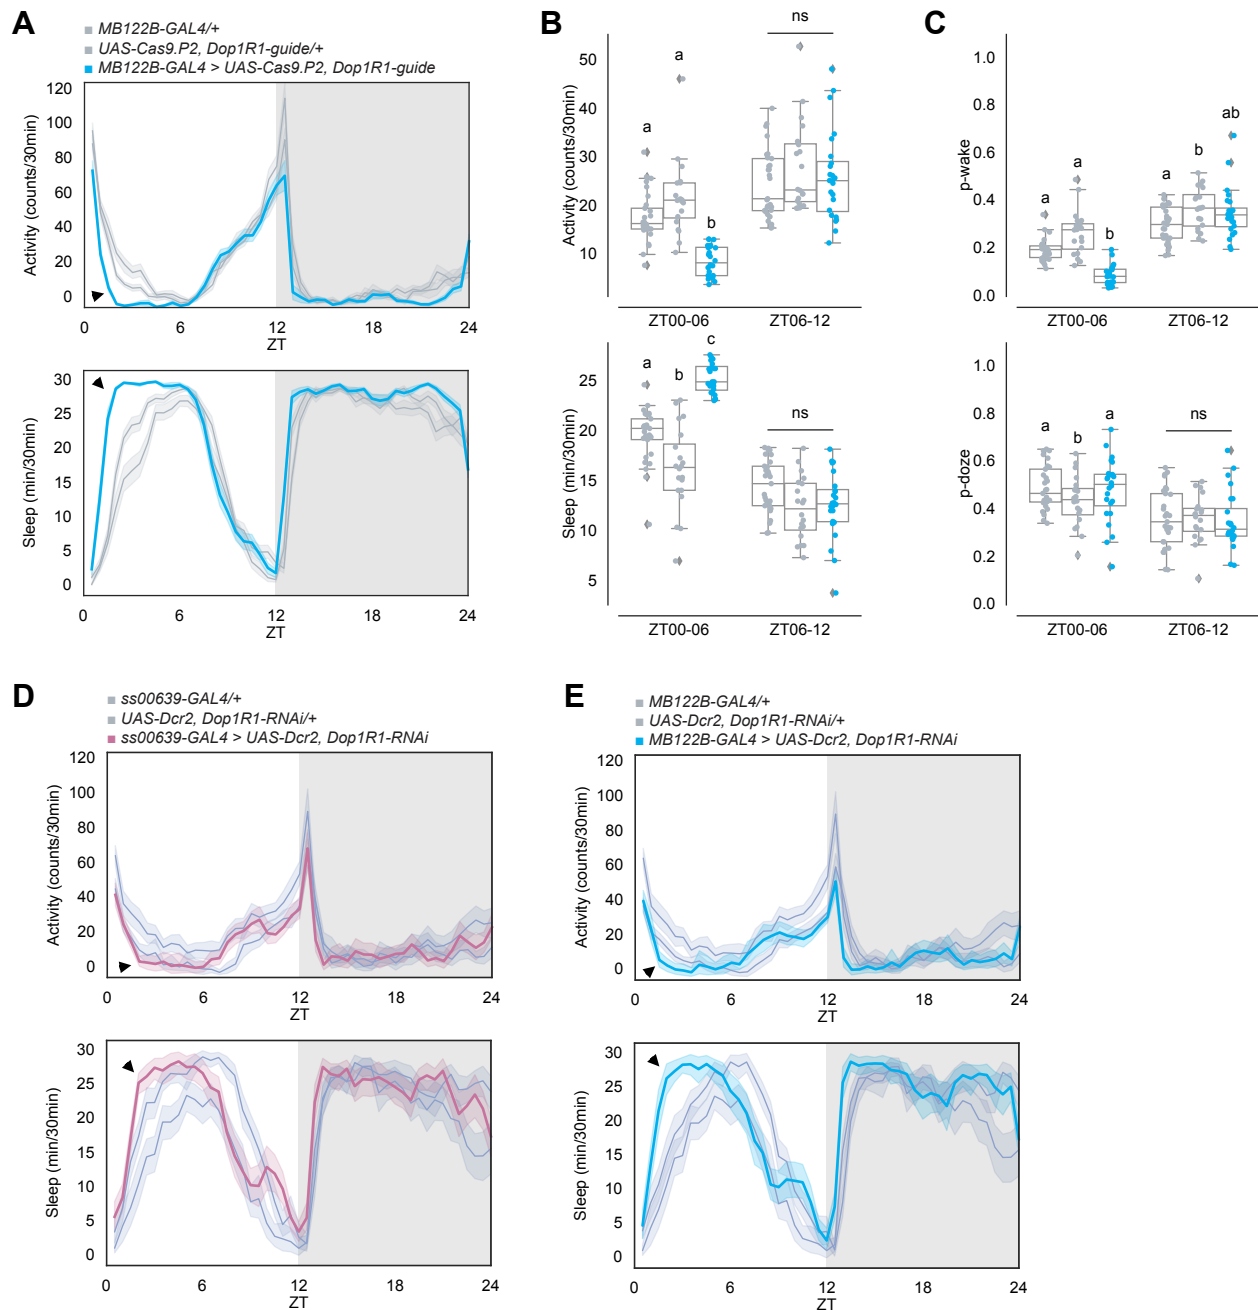

**Figure S5. RNAi Knockdown of Dop1R1 in ITP<sup>+</sup> LNs lead to a small deficit in morning wakefulness after the onset of light. Related to Figure 5.**

- (A) Timeseries plots of activity (top) and sleep (bottom) of male flies with *Dop1R1* knock-out in ITP<sup>+</sup> LNs and Trissin<sup>+</sup> LN<sub>s</sub> in 12:12 LD. Heterozygous *MB122B-GAL4* (n=29) and *UAS-Cas9.P2, Dop1R1-guide* (n=20) controls are in gray. Experimental flies (n=24) expressing all transgenes are colored. Bold lines are means and shaded regions are 95% confidence intervals of the means. Black arrowheads point to the major difference between control and experimental flies between ZT00 and ZT06.
- (B) Boxplots quantifying activity (top) and sleep (bottom) of male flies with *Dop1R1* knock-out in ITP<sup>+</sup> LNs and Trissin<sup>+</sup> LN<sub>s</sub> during ZT00-06 and ZT06-12 daytime bins. Genotypes are depicted by the same color scheme as in (A). Letters represent statistically distinct groups as tested by a Kruskal

Wallis test, post-hoc Mann Whitney U multiple comparisons method, and a Bonferroni-corrected significance value of  $p < 0.01667$ . Groups labeled with “ns” are not statistically distinct.

- (C) Boxplots quantifying p-wake (top) and p-doze (bottom) of male flies with *Dop1R1* knock-out in ITP<sup>+</sup> LNs and Trissin<sup>+</sup> LNs during ZT00-06 and ZT06-12 daytime bins. Genotypes are depicted by the same color scheme as in (A). Letters represent statistically distinct groups as tested by a Kruskal Wallis test, post-hoc Mann Whitney U multiple comparisons method, and a Bonferroni-corrected significance value of  $p < 0.01667$ . Groups labeled with “ns” are not statistically distinct.
- (D) Timeseries plots of activity (top) and sleep (bottom) of female flies with *Dop1R1* knock-down in ITP<sup>+</sup> LNs in 12:12 LD. Heterozygous *ss00639-GAL4* (n=32) and *UAS-Dcr2, Dop1R1-RNAi* (n=32) controls are in gray. Experimental flies (n=32) expressing all transgenes are colored. Bold lines are means and shaded regions are 95% confidence intervals of the means. Black arrowheads point to the major difference between control and experimental flies between ZT00 and ZT06.
- (E) Timeseries plots of activity (top) and sleep (bottom) of female flies with *Dop1R1* knock-down in ITP<sup>+</sup> LNs and Trissin<sup>+</sup> LNs in 12:12 LD. Heterozygous *MB122B-GAL4* (n=32) and *UAS-Dcr2, Dop1R1-RNAi* (n=32) controls are in gray. Experimental flies (n=31) expressing all transgenes are colored. Bold lines are means and shaded regions are 95% confidence intervals of the means. Black arrowheads point to the major difference between control and experimental flies between ZT00 and ZT06.



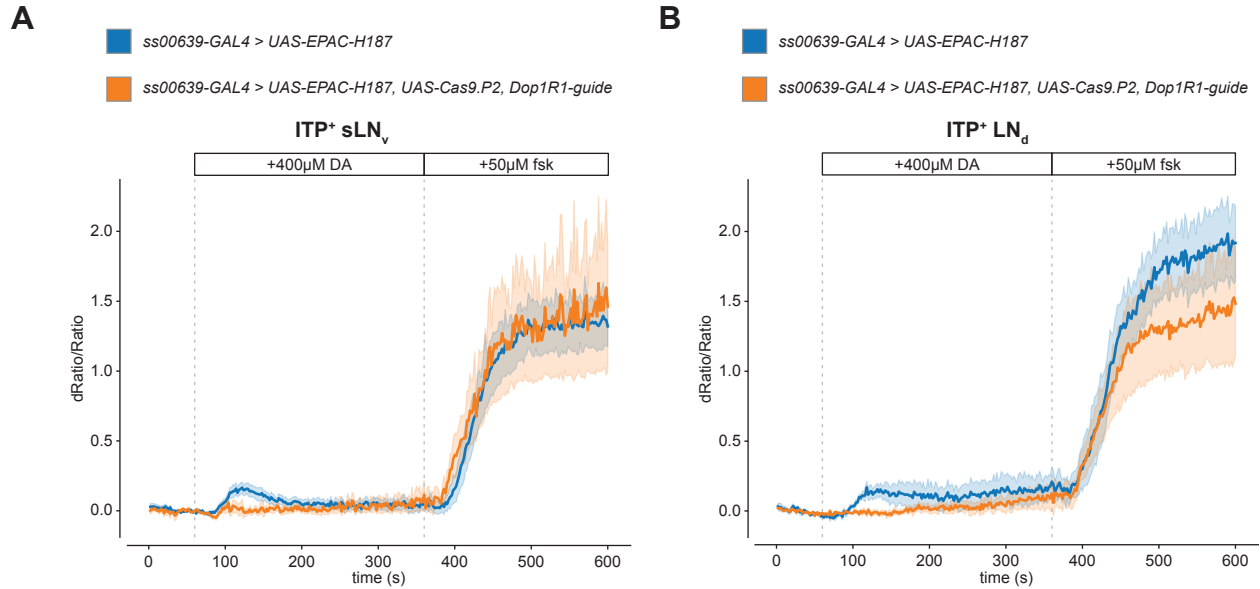

**Figure S6. cAMP responses to dopamine are dependent on Dop1R1 expression in ITP<sup>+</sup> LNs. Related to Figure 6.**

- (A) Timeseries plot of cAMP levels at baseline and in response to 400μM dopamine and 50μM forskolin perfusion as measured by *UAS-EPAC-H187* in the ITP<sup>+</sup> sLN<sub>v</sub> with (orange, n=5) and without (blue, n=5) Dop1R1 knock-out using *UAS-Cas9.P2, Dop1R1-guide*. Bold lines are means shown with a simple moving average of two data points and shaded regions are 68% confidence intervals of the means.
- (B) Timeseries plot of cAMP levels at baseline and in response to 400μM dopamine and 50μM forskolin perfusion as measured by *UAS-EPAC-H187* in the ITP<sup>+</sup> LN<sub>d</sub> with (orange) and without (blue) Dop1R1 knock-out using *UAS-Cas9.P2, Dop1R1-guide*. Bold lines are means shown with a simple moving average of two data points and shaded regions are 68% confidence intervals of the means.

### Supplemental References

- S1 Plaza, S.M., Clements, J., Dolafi, T., Umayam, L., Neubarth, N.N., Scheffer, L.K., and Berg, S. (2022). neuPrint: An open access tool for EM connectomics. *Front. Neuroinform.* *16*, 73. [10.3389/FNINF.2022.896292/BIBTEX](https://doi.org/10.3389/FNINF.2022.896292/BIBTEX).
- S2 Ma, D., Przybylski, D., Abruzzi, K.C., Schlichting, M., Li, Q., Long, X., and Rosbash, M. (2021). A transcriptomic taxonomy of drosophila circadian neurons around the clock. *Elife* *10*, 1–19. [10.7554/eLife.63056](https://doi.org/10.7554/eLife.63056).
